# Supplementary material
Source: publisher figshare collection journal article supplement (https://sage.figshare.com/ndownloader/files/42875424)

Rivalries by Country (1990–2015)

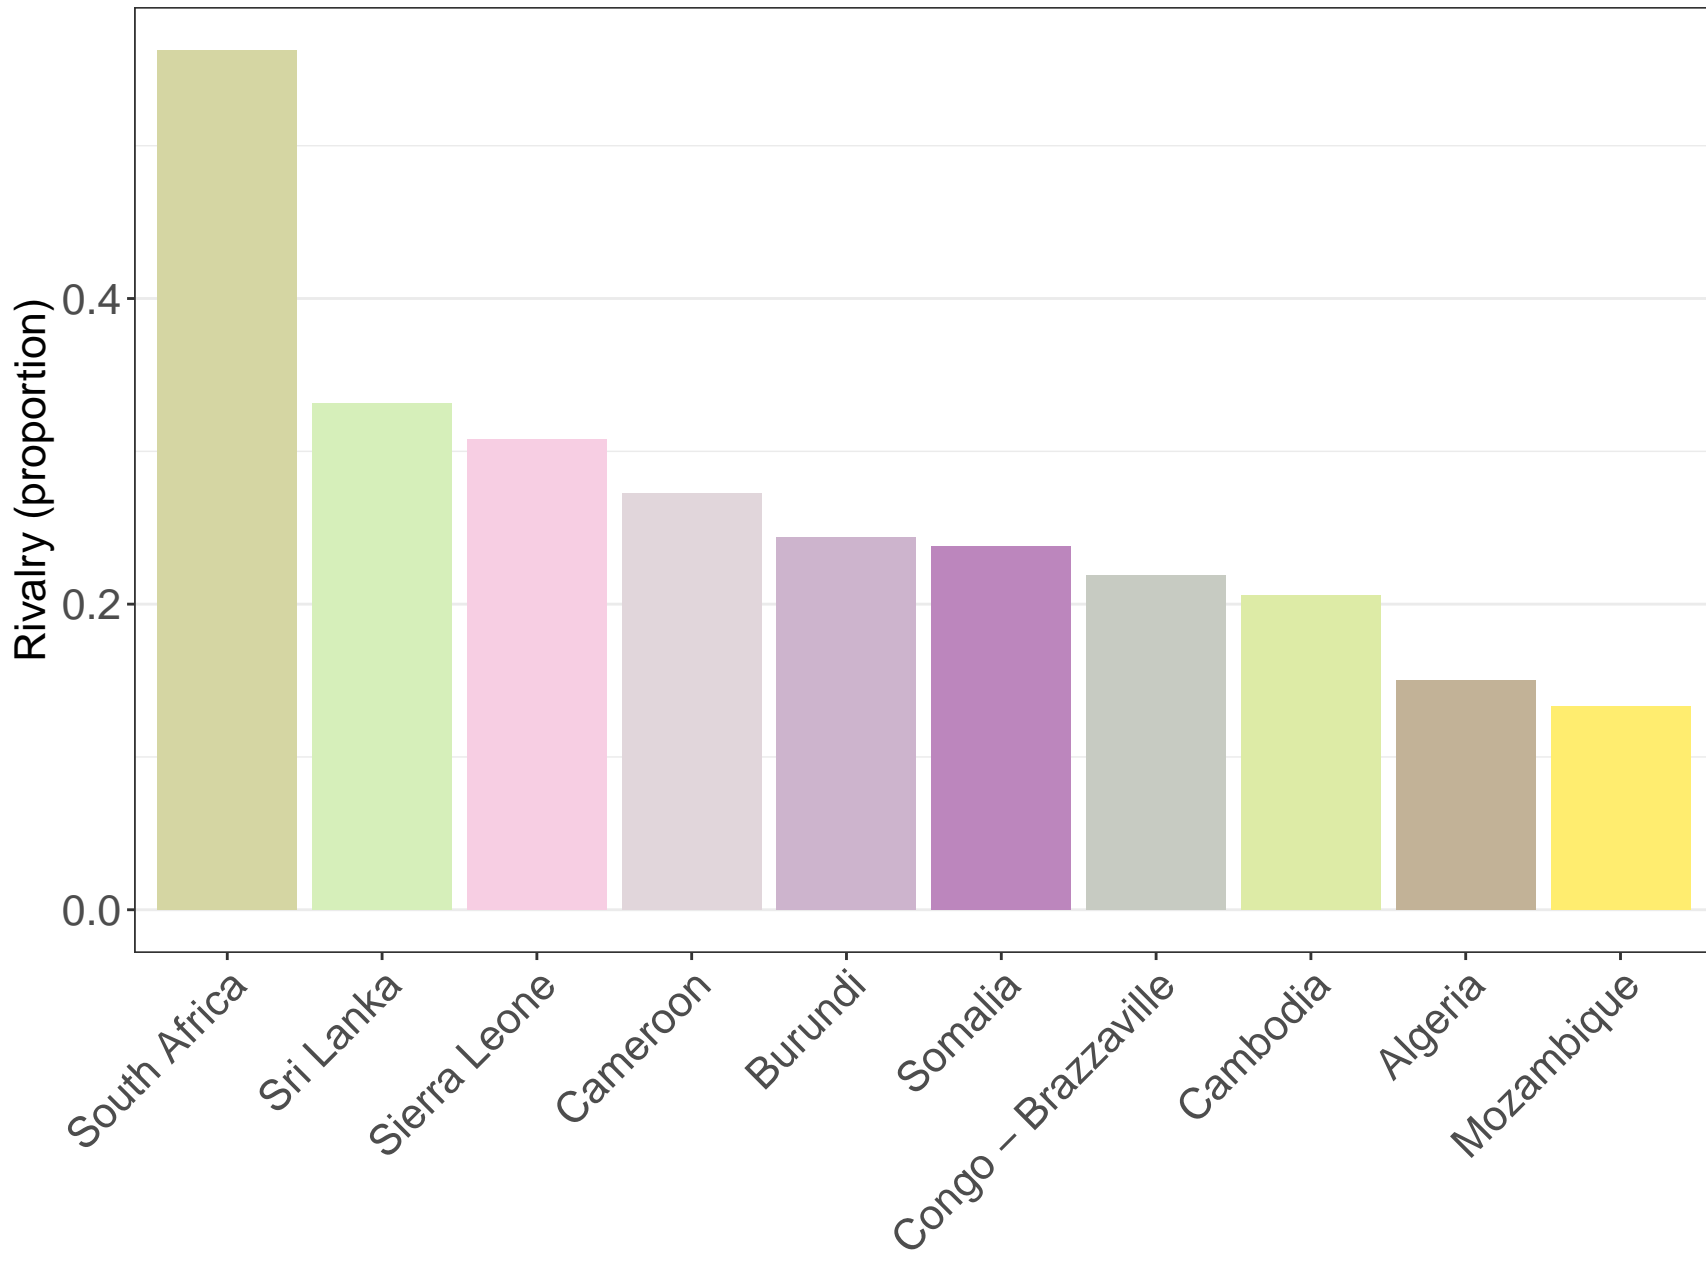

Supplement: Supplementary file 1 [file 42875424]

Rivalries by Country (1990–2015)

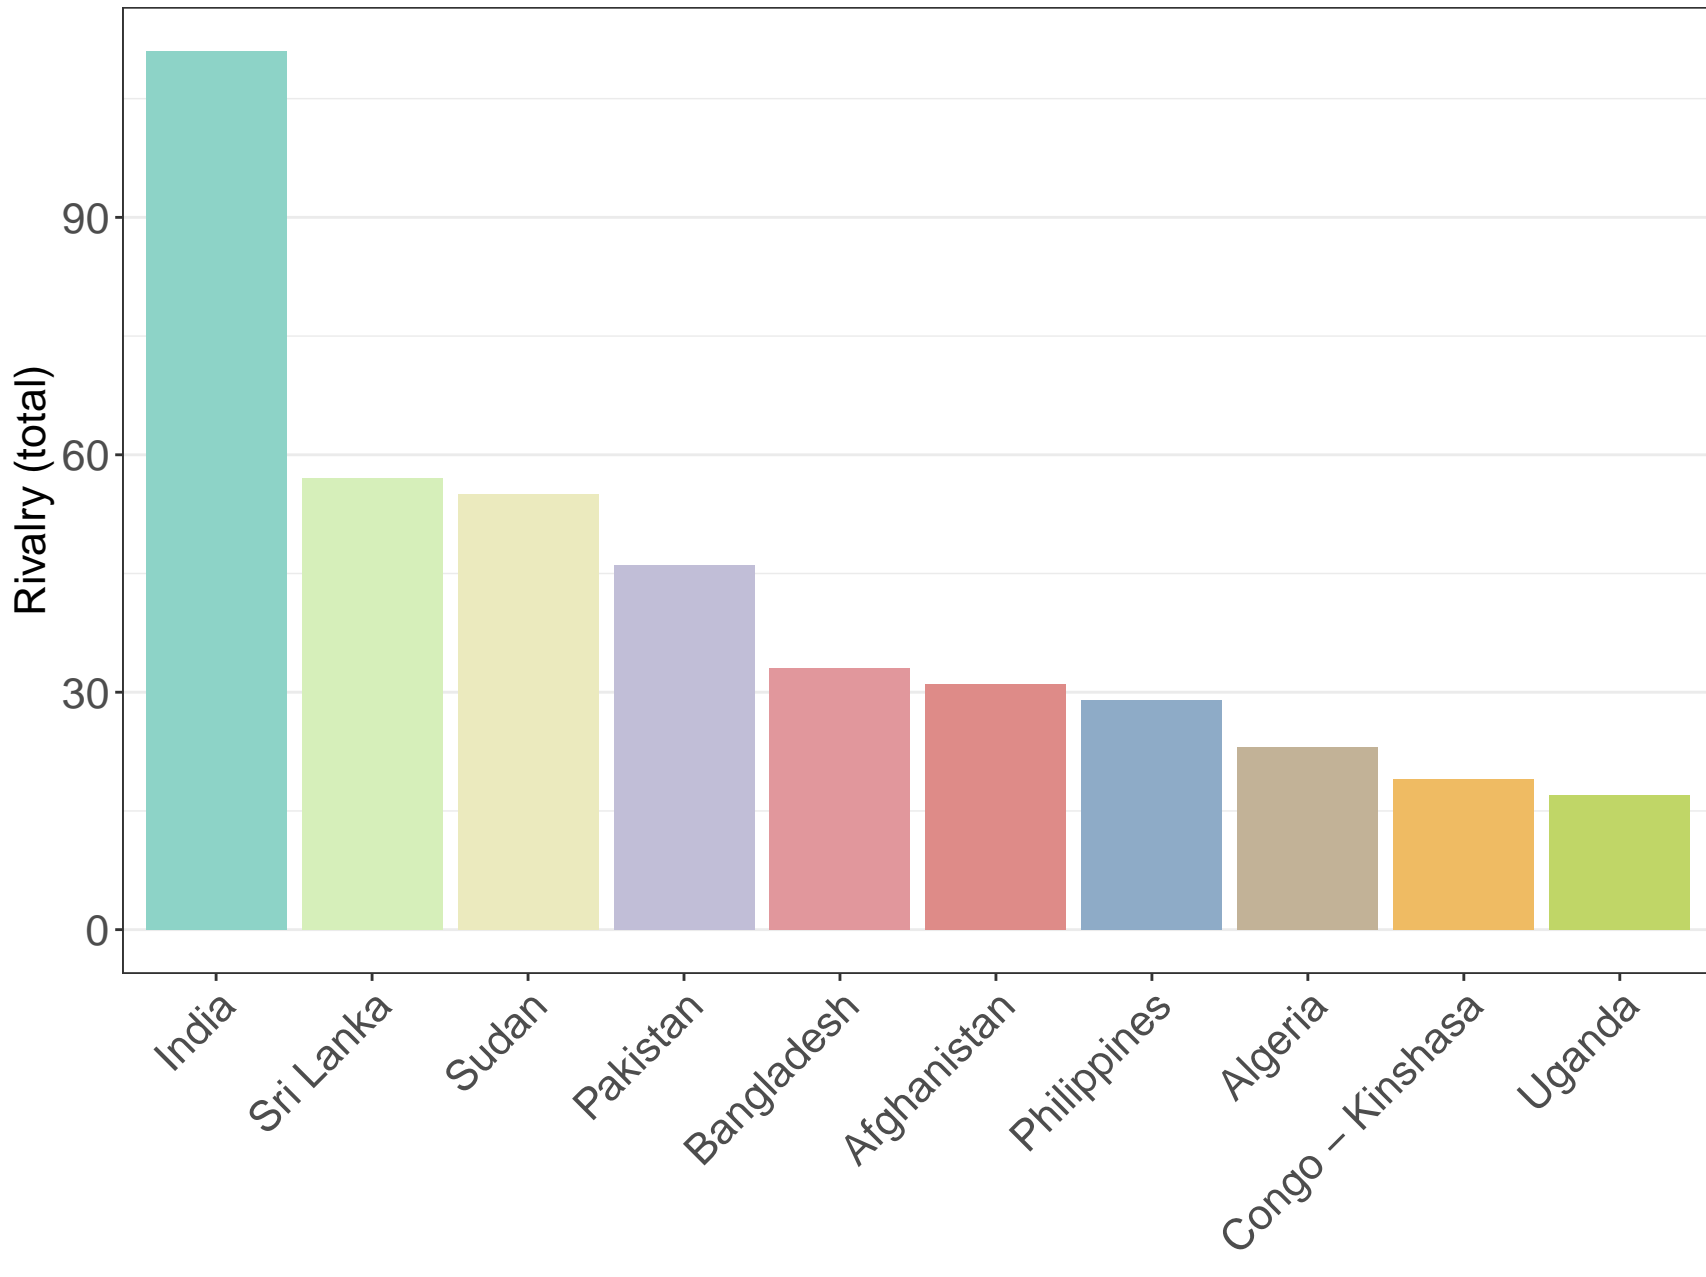

Supplement: Supplementary file 2 [file 42875424]

Yearly Rivalries (1990–2015)

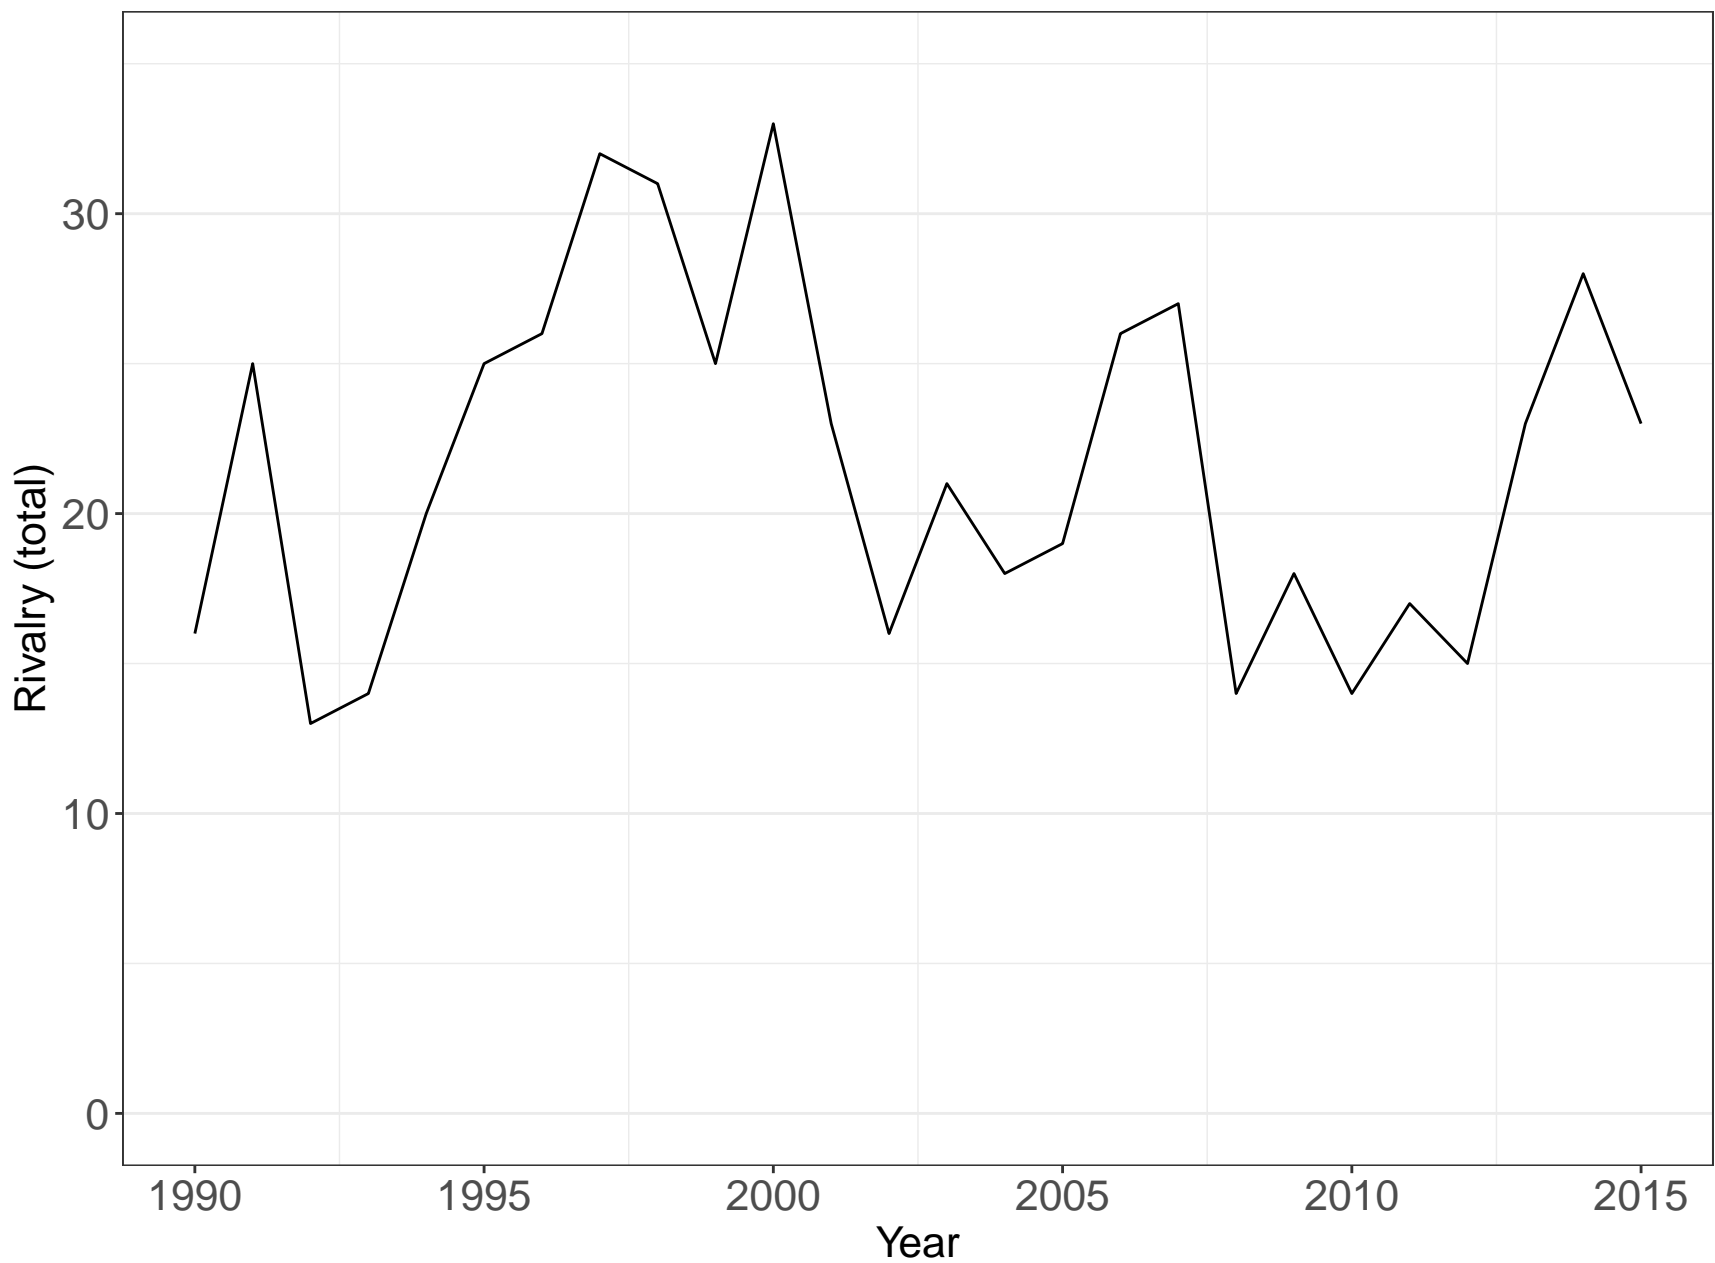

Supplement: Supplementary file 3 [file 42875424]

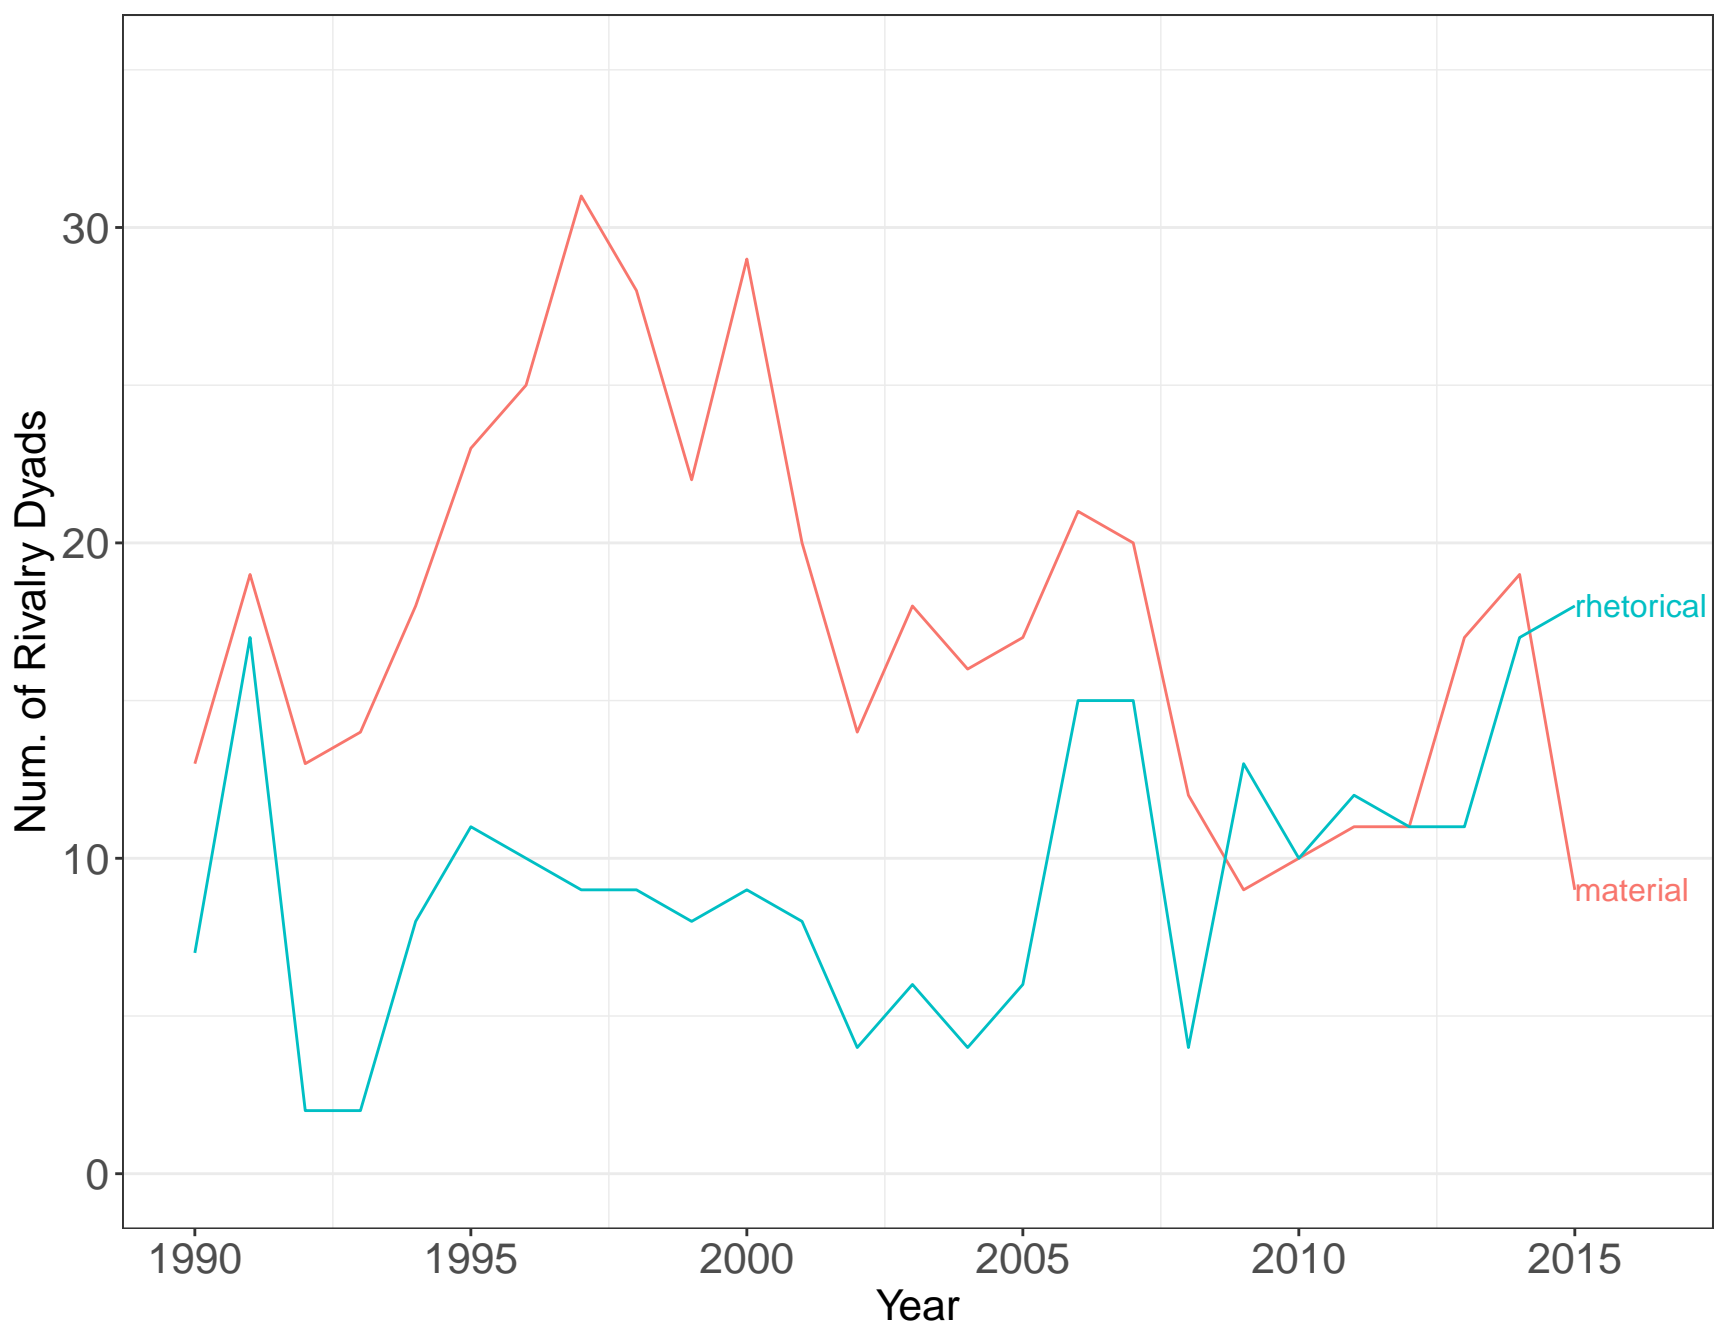

Supplement: Supplementary file 4 [file 42875424]

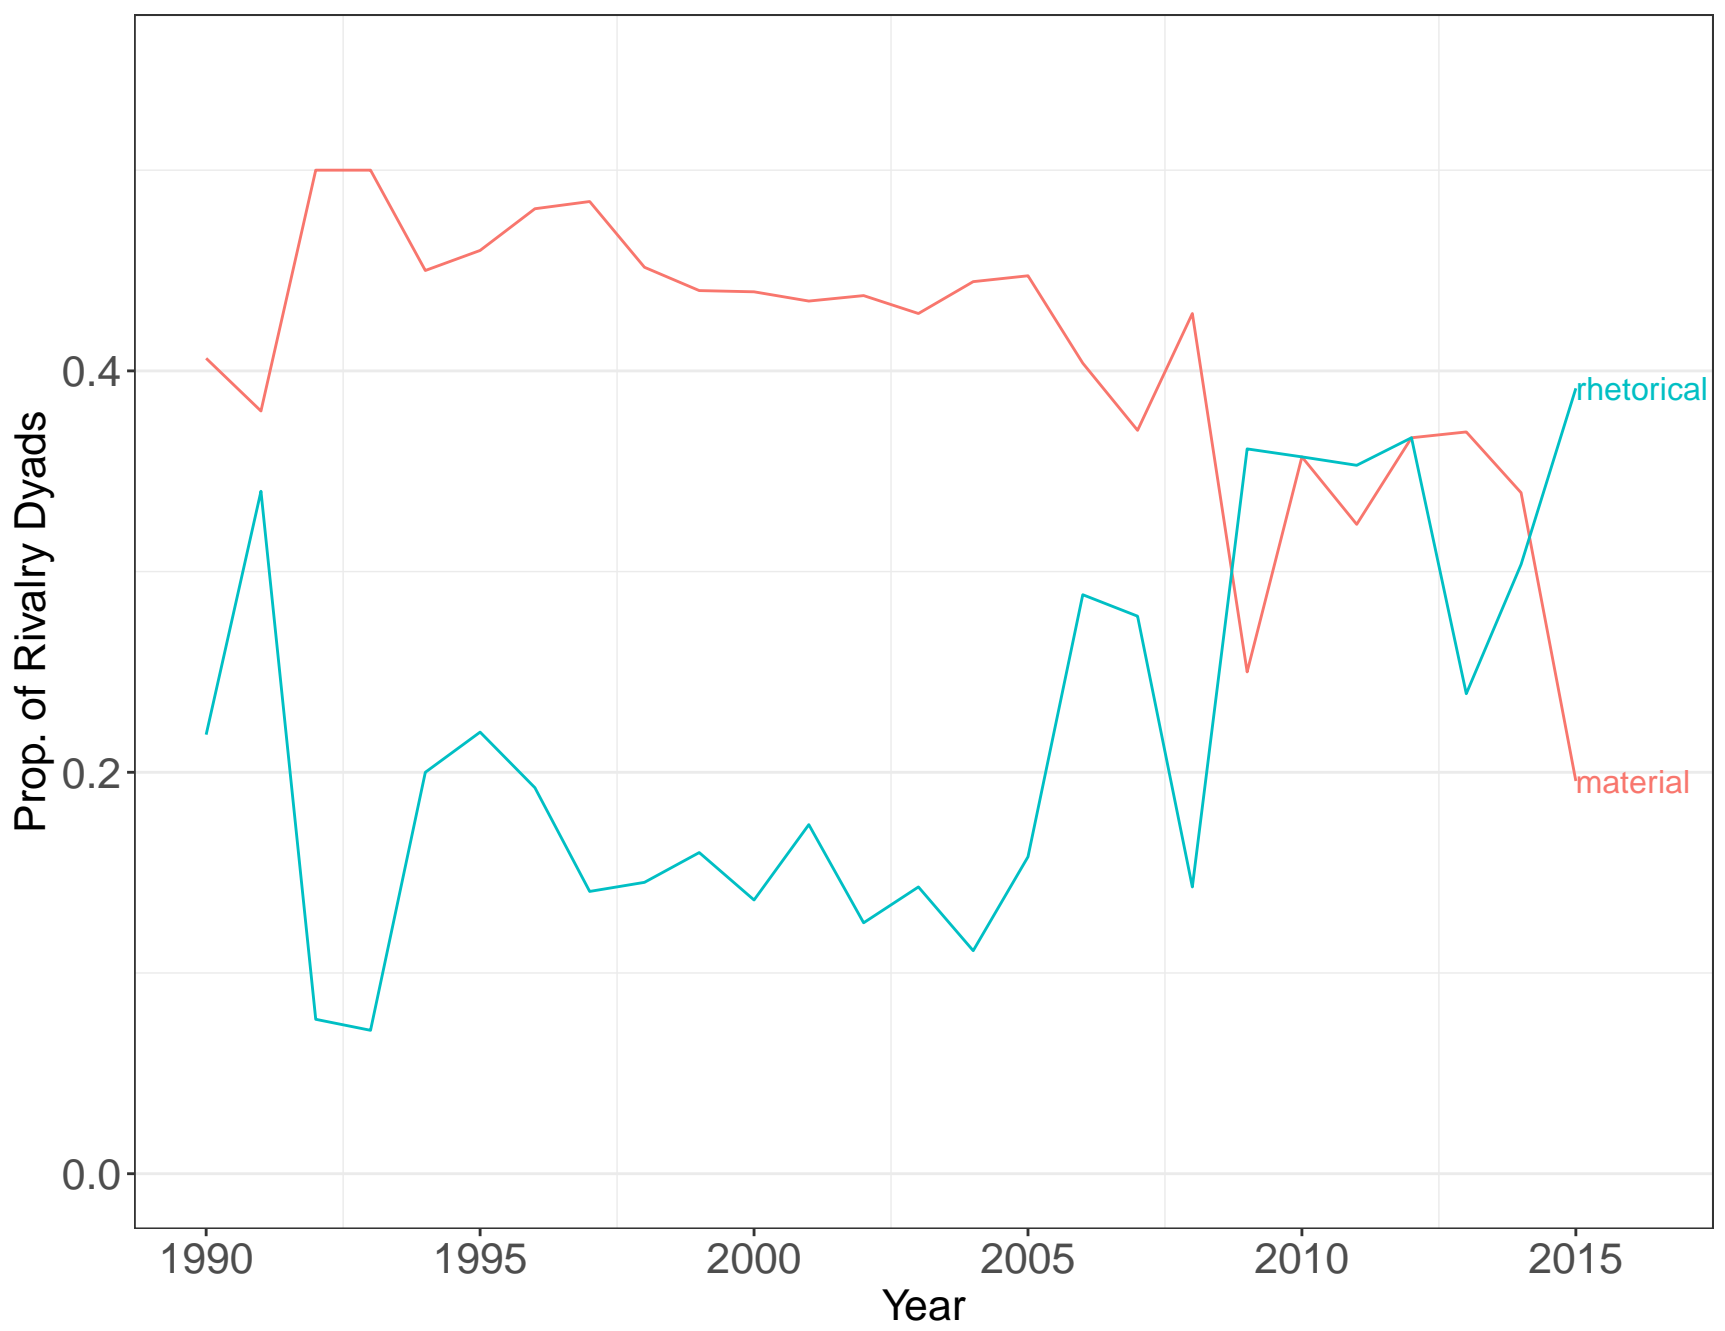

Supplement: Supplementary file 5 [file 42875424]

Rivalry Intensity

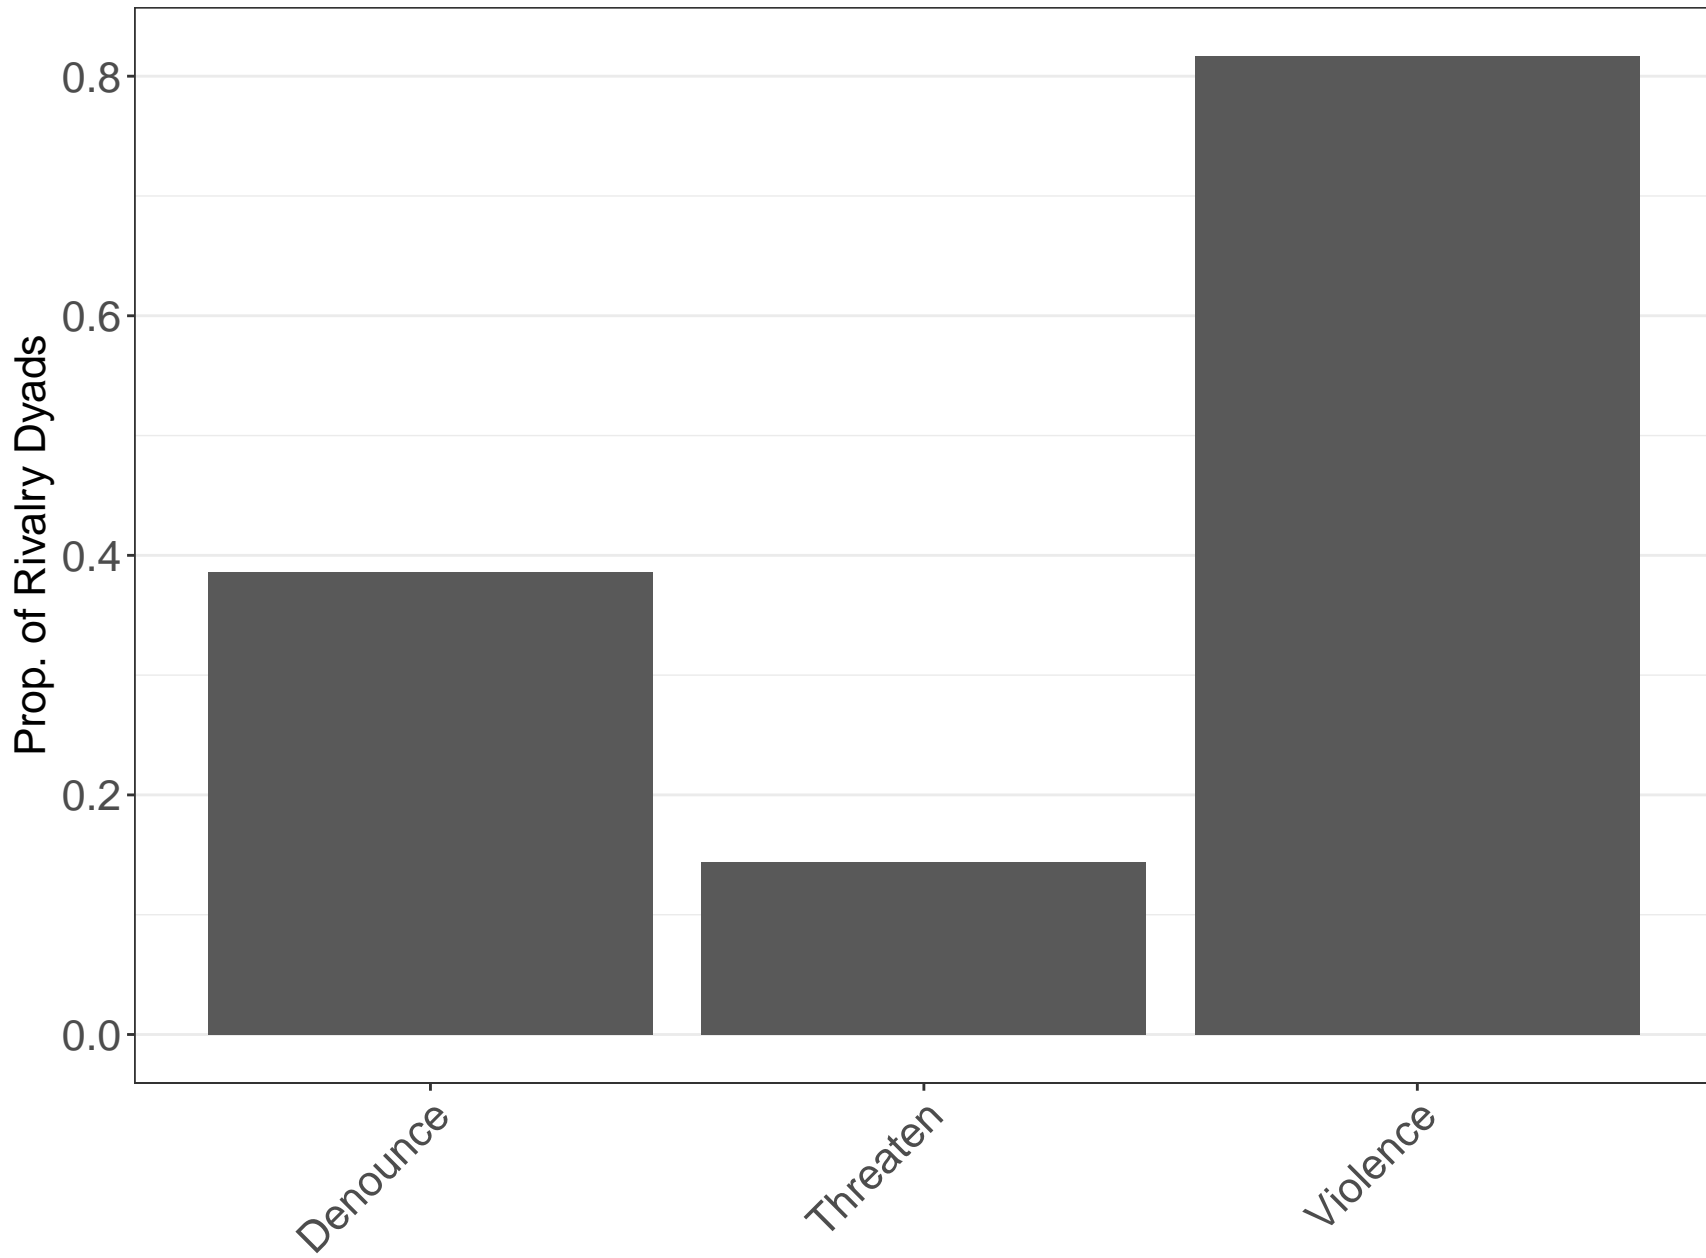

Supplement: Supplementary file 6 [file 42875424]

Yearly Rivalries (1990–2015)

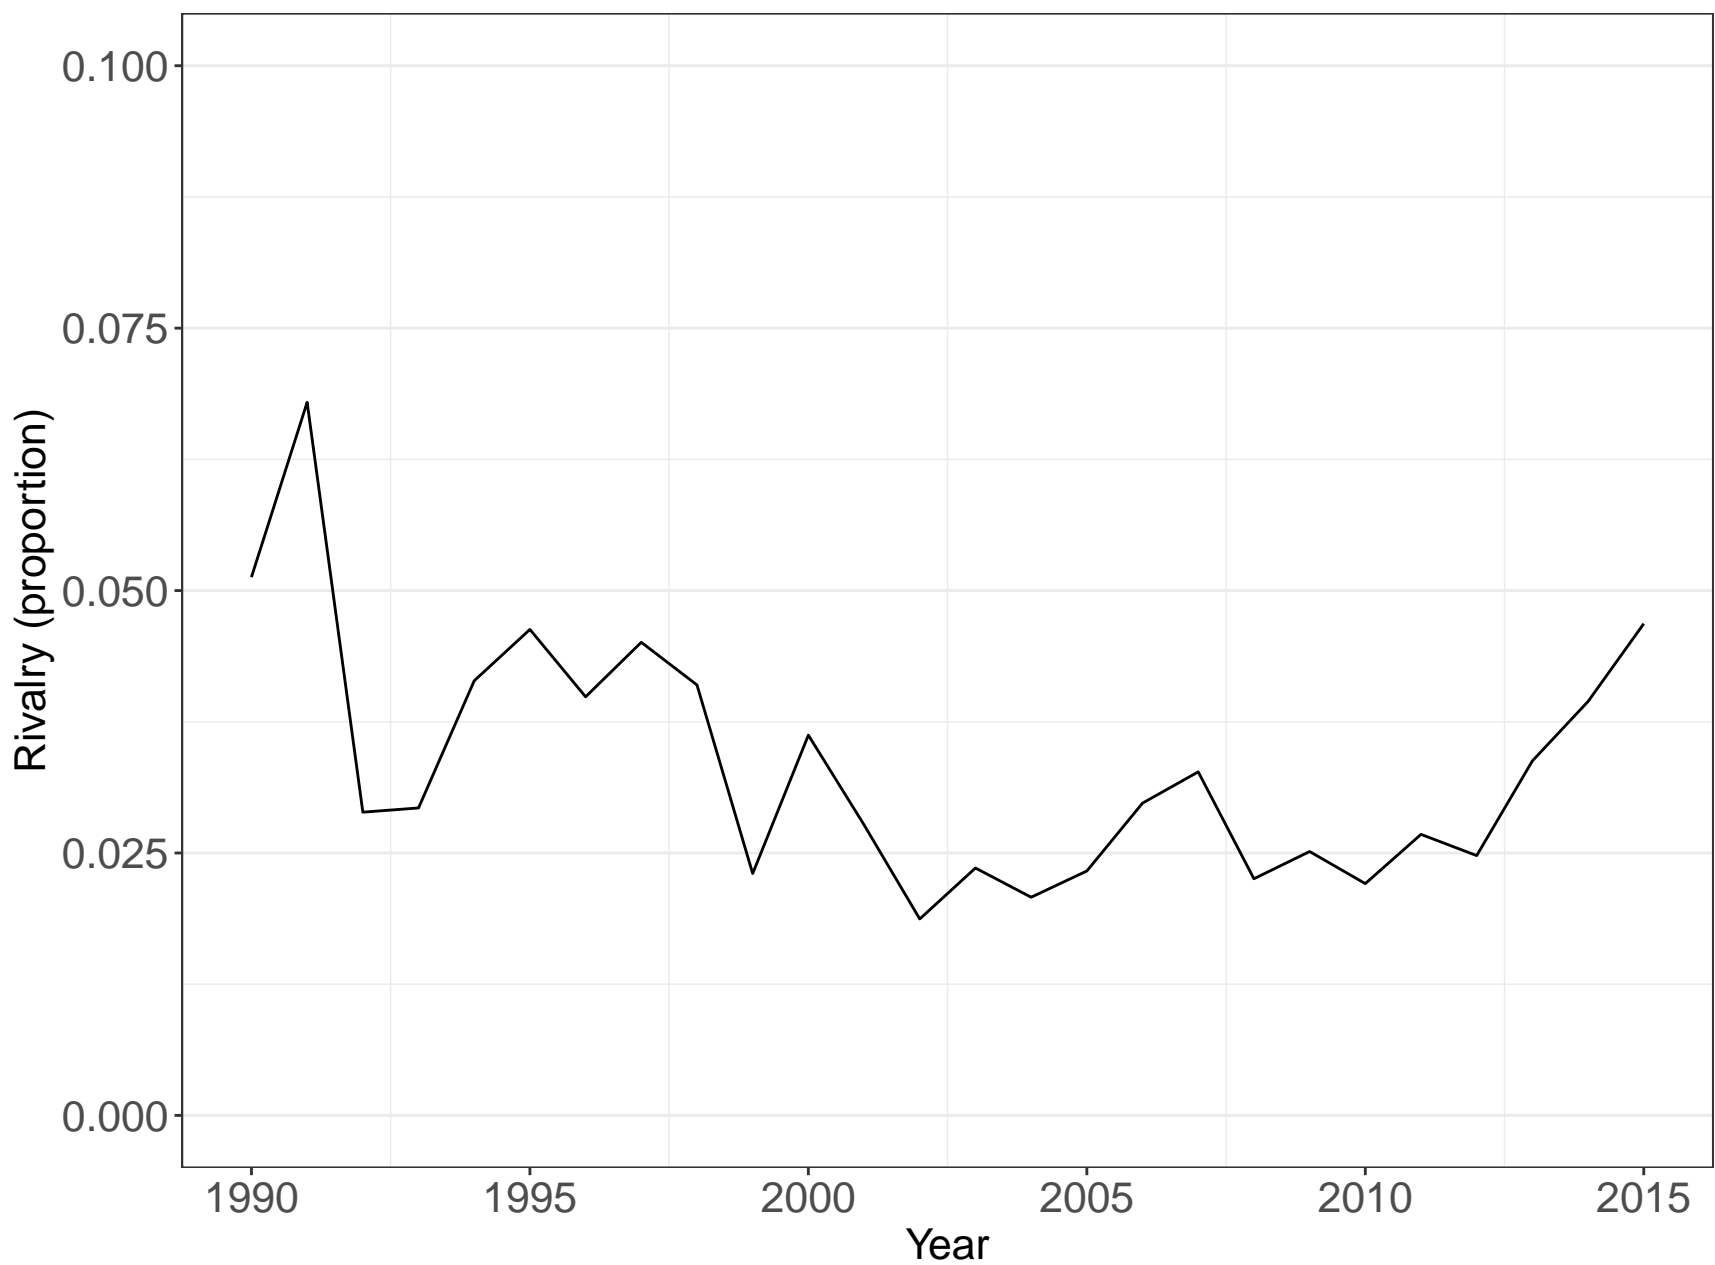

Supplement: Supplementary file 7 [file 42875424]

Rivalries Within and Across Data Sources

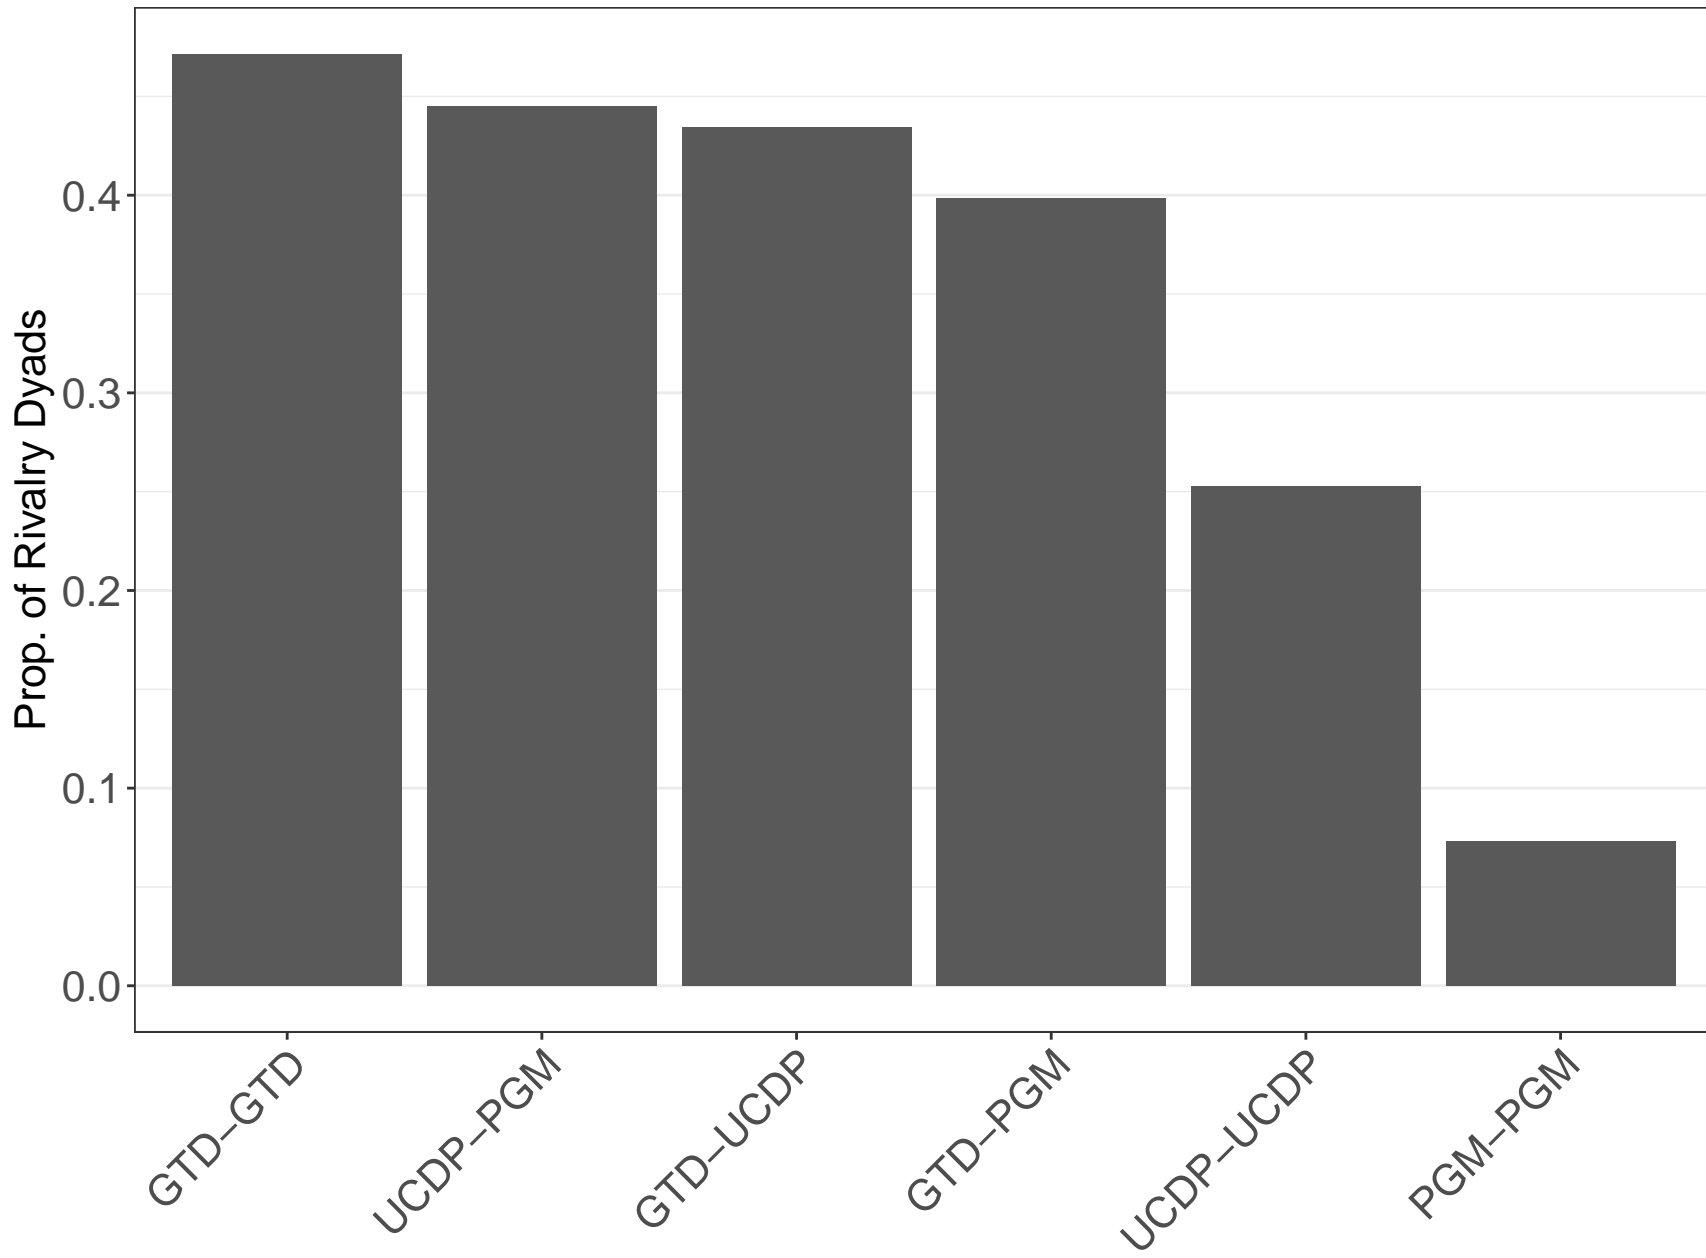

Supplement: Supplementary file 8 [file 42875424]
